# Supplementary material
Source: PubMed Central journal article supplement (PMC5241907)
Supplement: NIHMS799766-supplement-Questionairre.pdf [file NIHMS799766-supplement-Questionairre.pdf]

## Diagnostic Error Project Survey

Welcome to the QUILN Ambulatory Diagnostic Errors Project Survey

**Thank you for helping QUILN understand your interests in a potential future quality improvement project for the ambulatory primary care setting. Your opinions are important to us and we appreciate your time.**

**Diagnostic errors are defined as 1) unintentionally delayed diagnoses, 2) wrong diagnoses and 3) missed diagnoses. The problem of diagnostic errors is rampant in medicine, although few studies investigate pediatric diagnostic errors and even fewer attempt to reduce them. For example, errors in diagnosis were the most prevalent cause for closed pediatric malpractice claims with an average indemnity payment of \$260,015. When surveyed, 54% of pediatricians reported making a diagnostic error at least once or twice per month and 45% reported making diagnostic errors that harm patients at least once or twice per year.**

**The purpose of this survey is to understand your interest as an ambulatory primary care physician in doing a project on diagnostic errors in pediatric primary care and the best way to set up such a project so it is relevant to you, your practice and your patients. The survey has 15 questions and should take less than 10 minutes to complete.**

**Thank you for your time and assistance in making the best possible QUILN projects!  
--Keri Thiessen and Dr. Steven Kairys**

# Diagnostic Error Project Survey

## Demographic Information

\* 1. Please indicate your Provider type:

- Ambulatory Primary Care Physician: Private Practice
- Ambulatory Primary Care Physician: Academic Medical Center Practice
- Inpatient Pediatric Hospitalist
- Physician Subspecialist

Other (please specify)

## Diagnostic Error Project Survey

### Demographic Information

\* 2. Approximately how many patients does your practice see each year?

\* 3. Does your practice have an Electronic Medical Record (EMR)?

Yes

No

4. If your practice has an Electronic Medical Record (EMR), which one?

## Diagnostic Error Project Survey

### Project Description Questions

\* 5. How interested would you be in participating in a QuIIN project to reduce pediatric diagnostic errors?

- Very Interested
- Somewhat Interested
- Neutral
- Disinterested
- Very Disinterested

\* 6. Would you be more or less interested in participating in a diagnostic error QuIIN project if there were NO face-to-face learning sessions during the project, and instead, learning sessions were conducted via WEBINAR?

- Much More Interested
- More Interested
- Neutral
- Less Interested
- Much Less Interested

\* 7. Would you be more or less interested in participating in a QuIIN project on diagnostic errors that used RANDOMIZATION? (All practices ultimately receive the intervention but during the first year, practices will be randomized to intervention and control groups, allowing for more convincing scientific results. The control group will collect some data during the first year and participate in the intervention during the second year of the project)

- Much More Interested
- More Interested
- Neutral
- Less Interested
- Much Less Interested

\* 8. Would receiving ABP MOC Part 4 credit impact your decision to participate in a QUILIN project?

- I would only participate if Part 4 credit were offered
- Part 4 credit would not impact my decision to participate

9. If Part 4 MOC credit were offered and your practice decided to participate in the project, how many OTHER physicians in your practice would also participate?

Number of physicians  
besides yourself:

# Diagnostic Error Project Survey

## Project Measures Questions

\* 10. How interested would you be in TRYING TO IMPROVE the following diagnostic errors during a diagnostic errors QUILN project?

|                                                            | Not At All Interested | Not Interested        | Neutral               | Interested            | Very Interested       |
|------------------------------------------------------------|-----------------------|-----------------------|-----------------------|-----------------------|-----------------------|
| Missed diagnosis of hypertension                           | <input type="radio"/> |
| Delayed diagnosis following positive newborn screen        | <input type="radio"/> |
| Missed diagnosis of adolescent depression                  | <input type="radio"/> |
| Missed diagnosis of appendicitis                           | <input type="radio"/> |
| Missed diagnosis of post-partum depression                 | <input type="radio"/> |
| Delayed diagnosis of abnormal laboratory values            | <input type="radio"/> |
| Delayed diagnosis because of missed sub-specialty referral | <input type="radio"/> |
| Missed diagnosis of sexually transmitted infections        | <input type="radio"/> |
| Missed diagnosis of ankle fracture                         | <input type="radio"/> |
| Missed diagnosis of medication side effects                | <input type="radio"/> |
| Missed diagnosis of asthma                                 | <input type="radio"/> |
| Missed diagnosis of meningitis                             | <input type="radio"/> |
| Missed diagnosis of developmental dysplasia of the hip     | <input type="radio"/> |
| Missed diagnosis of testicular torsion                     | <input type="radio"/> |
| Missed diagnosis of obesity                                | <input type="radio"/> |

Other (please specify)

\* 11. Which diagnostic error would you be the MOST interested in trying to improve?

- Missed diagnosis of hypertension
- Delayed diagnosis following positive newborn screen
- Missed diagnosis of adolescent depression
- Missed diagnosis of appendicitis
- Missed diagnosis of post-partum depression
- Delayed diagnosis of abnormal laboratory values
- Delayed diagnosis because of missed sub-specialty referral
- Missed diagnosis of sexually transmitted infections
- Missed diagnosis of ankle fracture
- Missed diagnosis of medication side effects
- Missed diagnosis of asthma
- Missed diagnosis of meningitis
- Missed diagnosis of developmental dysplasia of the hip
- Missed diagnosis of testicular torsion
- Missed diagnosis of obesity

Other (please specify)



\* 12. Which diagnostic errors is your practice CURRENTLY trying to improve in any way? (select all that apply)

- Missed diagnosis of hypertension
- Delayed diagnosis following positive newborn screen
- Missed diagnosis of adolescent depression
- Missed diagnosis of appendicitis
- Missed diagnosis of post-partum depression
- Delayed diagnosis of abnormal laboratory values
- Delayed diagnosis because of missed sub-specialty referral
- Missed diagnosis of sexually transmitted infections
- Missed diagnosis of ankle fracture
- Missed diagnosis of medication side effects
- Missed diagnosis of asthma
- Missed diagnosis of meningitis
- Missed diagnosis of developmental dysplasia of the hip
- Missed diagnosis of testicular torsion
- Missed diagnosis of obesity
- None

Other (please specify)

\* 13. Which diagnostic errors does your practice's EMR HELP to reduce? (select all that apply)

- Missed diagnosis of hypertension
- Delayed diagnosis following positive newborn screen
- Missed diagnosis of adolescent depression
- Missed diagnosis of appendicitis
- Missed diagnosis of post-partum depression
- Delayed diagnosis of abnormal laboratory values
- Delayed diagnosis because of missed sub-specialty referral
- Missed diagnosis of sexually transmitted infections
- Missed diagnosis of ankle fracture
- Missed diagnosis of medication side effects
- Missed diagnosis of asthma
- Missed diagnosis of meningitis
- Missed diagnosis of developmental dysplasia of the hip
- Missed diagnosis of testicular torsion
- Missed diagnosis of obesity
- None
- We do not have an EMR

Other (please specify)

## Diagnostic Error Project Survey

### Personal Diagnostic Errors

**The below answers will be kept confidential and not be linked to your name or practice in any way.**

\* 14. How often do you estimate that YOU make a diagnostic error (delayed, wrong or missed diagnosis) of any kind, REGARDLESS of harm to the patient?

- Greater than 1-2 times a week
- 1-2 times a week
- 1-2 times a month
- 1-2 times a quarter
- 1-2 times a year
- Less than once a year
- Never

\* 15. An ADVERSE EVENT is defined as a complication, injury or harm to a patient resulting from medical management, and NOT from the patient's underlying condition or disease.

How often do you estimate that YOU are involved in a diagnostic error (delayed, wrong, or missed diagnosis) that causes a patient HARM, such as an adverse event?

- Greater than 1-2 times a week
- 1-2 times a week
- 1-2 times a month
- 1-2 times a quarter
- 1-2 times a year
- Less than once a year
- Never

## Diagnostic Error Project Survey

Thank You

**Thank you for your time and participation in this survey. We appreciate your efforts to improve future QullIN projects for you, your practice and your patients.**

16. Other comments on a potential diagnostic error QullIN project:
